# Supplementary material for: Second-Generation Transfer Mediates Efficient Propagation of ICEBs1 in Biofilms
Source: PubMed Central journal article supplement (PMC9578413; doi:10.1128/jb.00181-22), 2022-09-15
Supplement: jb.00181-22-s0001.pdf [file jb.00181-22-s0001.pdf]

A

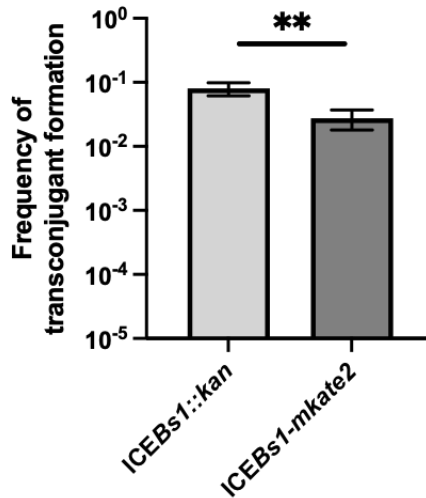

Figure S1. ICEBs1::mkate2 transfer at a slightly lower efficiency than ICEBs1::kan. Donor cells carrying ICEBs1::kan or ICEBs1-mkate2 were mated on MSgg medium at 30 °C for 20 h. The statistical analysis shows that ICEBs1-mkate2 transfer is slightly less efficient than the WT ICEBs1::kan but remains high (t-test; \*\*  $P < 0.01$ ). Error bars represent the standard deviation (SD). The result is representative of at least three

**A****MSNc****WT*****lytC******lytD***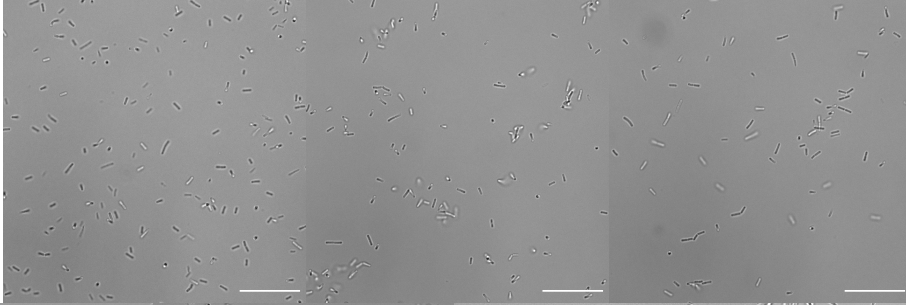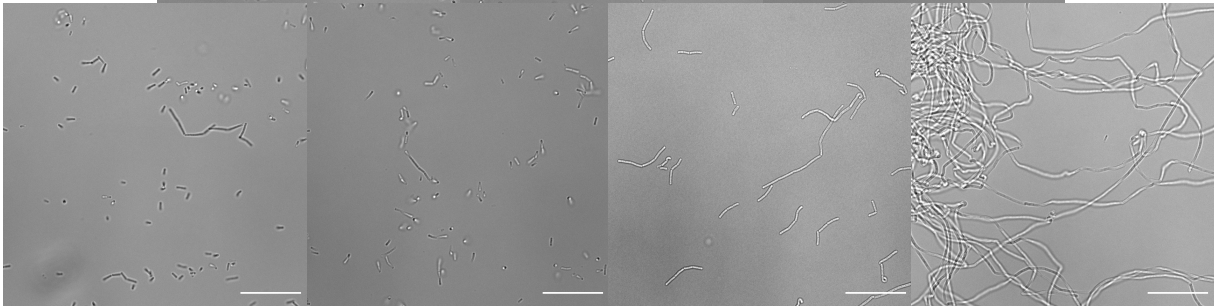***lytE******lytF******lytD lytE lytF******lytABC lytD lytE lytF*****B****MSgg**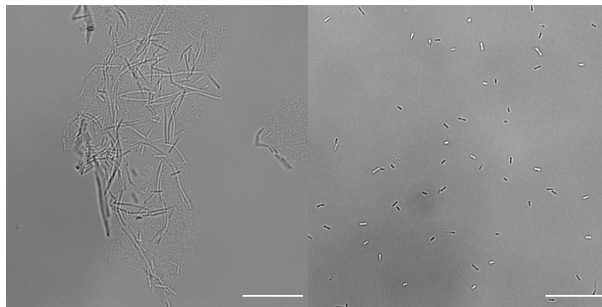**WT*****P<sub>hyperspank</sub>-lytABC***

Figure S2. Lytic enzyme mutant phenotype. (A) Lytic mutants were grown in liquid MSNc medium and incubated at 37 °C for 16 h with agitation prior to transferring on an agarose pad and imaged using epifluorescence microscopy. (B) Overexpression of *lytABC* was grown in liquid MSgg medium containing 50 μM IPTG and incubated at 30 °C for 16 h without agitation prior to transferring on an agarose pad and imaged using epifluorescence microscopy. The scales bars represent a size of 25 μm. Images are representative of the phenotype observed in at least 3 independent replicates°

**Video S1. Multiple transconjugant bacteria are not adjacent to donor cells.** Donor bacteria bearing *ICEBs1-mKate2* and expressing a CFP fluorescent protein were mated with recipients expressing a GFP fluorescent protein. Pictures were taken in a Z-stack of 10  $\mu\text{M}$  ticks and overlaid using ImageJ 3D Project. The movie shows only donor (blue) and *ICEBs1* (magenta) to have an easier view of the transconjugants. Donor bacteria appear blue to purple and transconjugants appear bright red. The scale bar represents a size of 10  $\mu\text{m}$ . The video shown is representative of conjugative clusters observed.

**Table S1. Strains**

| Strain              | Genotype                                                                                               | Construction                     |
|---------------------|--------------------------------------------------------------------------------------------------------|----------------------------------|
| 168                 | <b>Domesticated strain</b>                                                                             | Lab stock                        |
| NCIB 3610           | <b>Wild type</b> Undomesticated strain                                                                 | Lab stock                        |
| JSB86               | JH642 ICEBs1ΔconG:: <i>kan trpC2 pheA1</i>                                                             | This study                       |
| JSB93               | ICEBs1ΔconG:: <i>kan</i>                                                                               | This study                       |
| FL62 (1)            | ICEBs1- <i>kan ycbU-lmrB::spec</i>                                                                     | Lab stock                        |
| MG25 (1)            | ICEBs1 <sup>0</sup> <i>ylnF/yboA::Tn917 ::amyE::cat</i>                                                | Lab stock                        |
| DL875 (2)           | <i>amyE::Pskf-yfp lacA::PtapA-cfp (erm)</i>                                                            | Lab stock                        |
| MG13 (1)            | ICEBs1 <sup>0</sup>                                                                                    | Lab stock                        |
| JSB103              | 168 <i>amyE::P<sub>hypersnak</sub>-conG (spec)</i>                                                     | This study                       |
| JSB105              | ICEBs1 <sup>0</sup> <i>amyE::P<sub>hypersnak</sub>-conG (spec) lacA::P<sub>tapA</sub>-cfp (erm)</i>    | DL875 (2) and JSB103 in MG13 (1) |
| JSB106              | ICEBs1ΔconG:: <i>kan amyE ::P<sub>hyperspank</sub>-conG (spec)</i>                                     | JSB103 in JSB93                  |
| CAL51 (3)           | JH642 opp::(Tn917lac::pTV21?2 cat) Δ( <i>rapI phrI</i> )342:: <i>kan amyE::[(Pspank(hy)-rapI) spc]</i> | Lab stock                        |
| MG28 (1)            | ICEBs1- <i>kan</i>                                                                                     | Lab stock                        |
| JSB107              | ICEBs1- <i>kan amyE::P<sub>spank(hy)</sub>-rapI (spec)</i>                                             | CAL51 (3) in MG28 (1)            |
| VCL28 (1)           | <i>ycbU-lmrB::spec</i>                                                                                 | Lab stock                        |
| JSB97               | ICEBs1ΔconG:: <i>kan ycbU-lmrB::spec</i>                                                               | VCL28 (1) in JSB93               |
| JSB61               | 168 ICEBs1- <i>mkate2 (spec)</i>                                                                       | This study                       |
| JSB62               | ICEBs1- <i>mkate2 (spec)</i>                                                                           | JSB61 in NCIB 3610               |
| JSB68               | 168 <i>amyE::P<sub>hyperspank</sub>-cfp (spec)</i>                                                     | This study                       |
| JSB69               | ICEBs1 <sup>0</sup> <i>amyE::P<sub>hyperspank</sub>-cfp (spec)</i>                                     | JSB68 in MG13                    |
| JSB71               | ICEBs1- <i>mkate2 amyE::P<sub>hyperspank</sub>-cfp (spec)</i>                                          | JSB62 in JSB69                   |
| PB69 <sup>a</sup>   | <i>amyE ::Physpank-gfp (cat)</i>                                                                       | Lab stock                        |
| JSB79               | ICEBs1 <sup>0</sup> <i>amyE::P<sub>hyspank</sub>-gfp (cat)</i>                                         | PB69 <sup>a</sup> in MG13        |
| PB232 <sup>a</sup>  | <i>kinD::tet 317amE::kinD WT (spc) lacA::PtapA-yfp (erm) ywrK::Tn917::amyE::cat</i>                    | Lab stock                        |
| JSB66               | ICEBs1- <i>mkate2 lacA::P<sub>tapA</sub>-yfp (erm)</i>                                                 | PB232 <sup>a</sup> in JSB62      |
| JSB70               | ICEBs1 <sup>0</sup> <i>lacA ::P<sub>tapA</sub>-yfp amyE::P<sub>hyperspank</sub>-cfp (spec)</i>         | JSB68 and PB232 in MG13 (1)      |
| BJM396 <sup>b</sup> | PY79 <i>lytC::cat</i>                                                                                  | Lab stock                        |
| GJ4                 | ICEBs1 <sup>0</sup> <i>lytC::cat</i>                                                                   | BJM396 <sup>b</sup> in MG13 (1)  |
| BJM402 <sup>b</sup> | PY79 <i>lytD::cat</i>                                                                                  | Lab stock                        |
| GJ5                 | ICEBs1 <sup>0</sup> <i>lytD::cat</i>                                                                   | BJM402 <sup>a</sup> in MG13 (1)  |

|                     |                                                                       |                                  |
|---------------------|-----------------------------------------------------------------------|----------------------------------|
| BJM76 <sup>b</sup>  | PY79 <i>lytE::cat</i>                                                 | Lab stock                        |
| GJ6                 | ICEBs1 <sup>0</sup> <i>lytE::cat</i>                                  | BJM76 <sup>b</sup> in MG13 (1)   |
| BJM104 <sup>b</sup> | PY79 <i>lytF::cat</i>                                                 | Lab stock                        |
| GJ7                 | ICEBs1 <sup>0</sup> <i>lytF::cat</i>                                  | BJM104 <sup>b</sup> in MG13 (1)  |
| L16648              | 168 <i>lytABC::neo lytD::tet lytE::cat lytF::spc</i>                  | BGSC                             |
| BKE09420            | <i>trpC2 ΔlytE::erm</i>                                               | BGSC                             |
| GJ32                | ICEBs1 <sup>0</sup> <i>lytD::tet lytE::erm lytF::cat</i>              | L16648 and BJM104<br>in MG13 (1) |
| GJ42                | ICEBs1 <sup>0</sup> <i>lytABC::neo lytD::tet lytE::erm lytF::cat</i>  | L16648 and BJM104<br>in MG13 (1) |
| JSB100              | 168 <i>amyE::P<sub>hyperspank</sub>-lytABC (spec)</i>                 | This study                       |
| JSB101              | ICEBs1 <sup>0</sup> <i>amyE::P<sub>hyperspank</sub>-lytABC (spec)</i> | JSB100 in MG13 (1)               |
| FL94 (1)            | ICEBs1 <sup>0</sup> <i>ylnF/yboA::Tn917::amyE::cat sinR::spec</i>     | Lab stock                        |
| PB514 <sup>a</sup>  | PY79 <i>ylnF/yloA::Tn917::amyE::cat</i>                               | Lab stock                        |
| JSB19               | ICEBs1- <i>kan ylnF/ybaO::tn917::amyE::cat</i>                        | PB514 <sup>a</sup> in MG28 (1)   |
| SSB569 <sup>a</sup> | <i>tasA::erm epsA-O::tet</i>                                          | Lab stock                        |
| JSB125              | ICEBs1 <sup>0</sup> <i>epsA-O::tet</i>                                | SSB569 <sup>a</sup> in MG13      |
| PB194 <sup>a</sup>  | <i>sinR::spc epsA-O::tet</i>                                          | Lab stock                        |
| JSB127              | ICEBs1 <sup>0</sup> <i>epsA-O::tet sinR::spec</i>                     | PB194 <sup>a</sup> in JSB125     |
| JSB130              | 168 <i>tapA-sinR::erm</i>                                             | This study                       |
| JSB132              | ICEBs1 <sup>0</sup> <i>tapA-sinR::erm</i>                             | JSB130 in MG13                   |
| JSB133              | ICEBs1 <sup>0</sup> <i>tapA-sinR::erm epsA-O::tet</i>                 | JSB130 in JSB125                 |

\*Unless indicated, all strains are derivatives of *B. subtilis* NCIB 3610. Antibiotic: spectinomycin (spec), chloramphenicol (cat), erythromycin/lincomycin (erm), kanamycin (kan), tetracycline (tet), neomycin (neo)

<sup>a</sup>These strain come from the Kolter and/or Beaugard lab stock.

<sup>b</sup>These strains were gift of the Rudner's Lab

1. Lécuyer F, Bourassa J-S, Gélinas M, Charron-Lamoureux V, Burrus V, Beaugard PB. 2018. Biofilm Formation Drives Transfer of the Conjugative Element ICEBs1 in *Bacillus subtilis*. *mSphere* 3:e00473-18.
2. López D, Vlamakis H, Losick R, Kolter R. 2009. Cannibalism enhances biofilm development in *Bacillus subtilis*. *Mol Microbiol* 74:609–618.

3. Auchtung JM, Lee CA, Monson RE, Lehman AP, Grossman AD. 2005. Regulation of a *Bacillus subtilis* mobile genetic element by intercellular signaling and the global DNA damage response. *Proc Natl Acad Sci U S A* 102:12554–12559.

**Table S2. Plasmids**

| Strain | Plasmid name | Genotype                        | Antibiotics resistance       |
|--------|--------------|---------------------------------|------------------------------|
| GJ55   | pGJ1         | pDR111- <i>cfp</i>              | ampicillin and spectinomycin |
| JSB59  | pJSB12       | pDR111- <i>yddM-mkate2-attR</i> | ampicillin and spectinomycin |
| JSB83  | pJSB18       | pDR111- <i>lytABC</i>           | ampicillin and spectinomycin |
| JSB84  | pJSB19       | pminiMAD2- $\Delta$ <i>conG</i> | erythromycin and lincomycin  |
| JSB102 | pJSB22       | pDR111- <i>conG</i>             | ampicillin and spectinomycin |

**Table S3. Primers**

| Primer | Sequence (5'→3')                                                 |
|--------|------------------------------------------------------------------|
| P27    | GATCC TTTAA CTCTG GCAAC CCTC                                     |
| P28    | GCCGA CTGCG CAAAA GACAT AATCG                                    |
| P342   | TGT <u>GG ATCCG</u> AATCT CAGAT TGTTA ATCCT GC                   |
| P343   | TTAGG <u>ATCCA</u> ATCCA GTACA TTACG ATCTC                       |
| P344   | AATAG <u>GCGAT CGCGG</u> CGAAC TATGA GTTTG CTG                   |
| P496   | CACTG <u>AGCTC</u> GAGCA ACTTT AGAAA TCGAG TC                    |
| P507   | GCATG <u>AATTC</u> GACTC TCTAG CTTGA GGCAT C                     |
| P508   | CATCG <u>CATGC</u> TCATC TGTGC CCCAG TTTG                        |
| P719   | AGCTG <u>TCGAC</u> TAAAG GAGGA AGATT AGGAG GTGGT TGTA T          |
| P673   | GCTAG <u>CATGC</u> GCCGA GAATA CCAAA GGAAG AAC                   |
| P615   | GCCTC CAAGT CTCTA TGTT C AGC                                     |
| P616   | CGAAG <u>CATGC</u> CCAAC TGGTA ATGGT AGCGA C                     |
| P647   | GTAGG <u>TCGAC</u> ACATA AGGAG GAACT ACTCA TCCTT TGCAC CTCGT CTG |
| P648   | AGATG <u>CATGC</u> GACCT ATGCC AGTCA GTTTA GC                    |
| P668   | CATCG <u>GATCC</u> AACCA AACGA GCGTG AAGAA G                     |
| P669   | GTTCT TTCAT CCCTT CTCAG TCGAC AACCA CCTCC TAATC TAACC            |
| P670   | GGTTA GATTA GGAGG TGGTT GTCGA CTGAG AAGGG ATGAA AGAAC            |
| P674   | GTCCG <u>AATTC</u> ACATG GTCAA CATAA CTTGG GTC                   |
| P746   | CAAAA TCCGC TATGC AGGAG                                          |
| P747   | GAGGG TTGCC AGAGT TAAAG GATCG GCCAA TCAAT GTCAT CACC             |
| P748   | CGATT ATGTC TTTTG CGCAG TCGGC CTGAA AGCTG AAAGA TAAGC AGAAC      |
| P749   | AACCG CAAAT AACG AATAA GGTCC                                     |

\*Underlined sequence represents restriction site.
